# Supplementary material
Source: Springer Nature journal article supplement (https://www.springermedizin.de/resource/supplementary/12872_2006_118_MOESM7_ESM.pdf/9431054)

**Figure 4:**

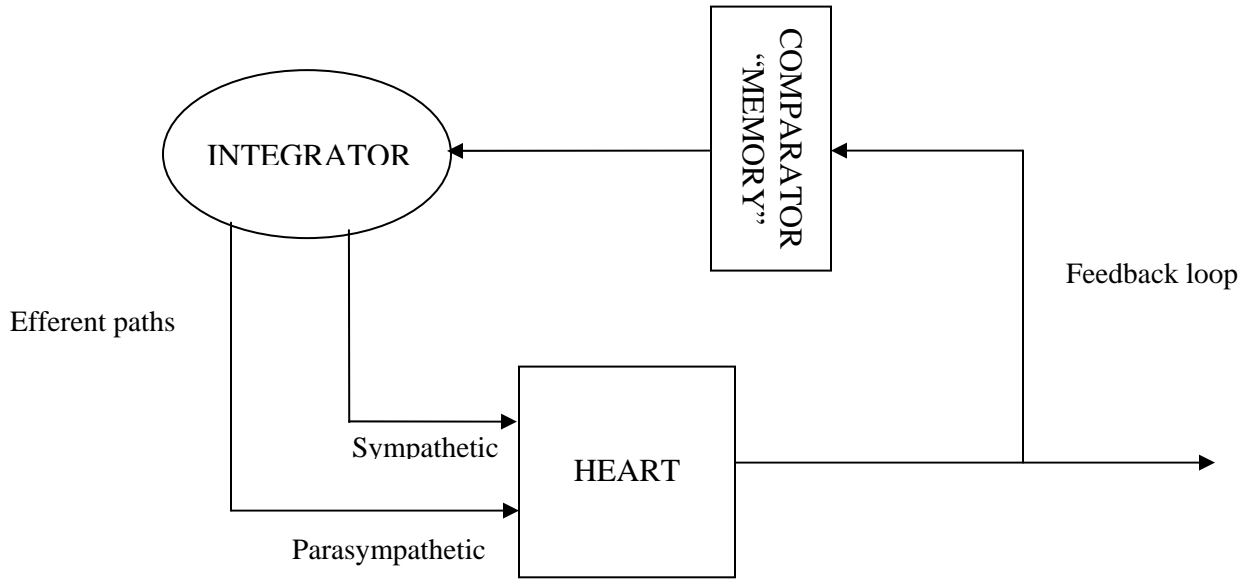

Supplement: MOESM7 [file 9431054]
